# Supplementary material for: Cardiovascular Characteristics of Zucker Fatty Diabetes Mellitus Rats, an Animal Model for Obesity and Type 2 Diabetes
Source: MDPI journal article supplement (doi:10.3390/ijms23084228), 2022-04-11
Supplement: s1 [file s1]

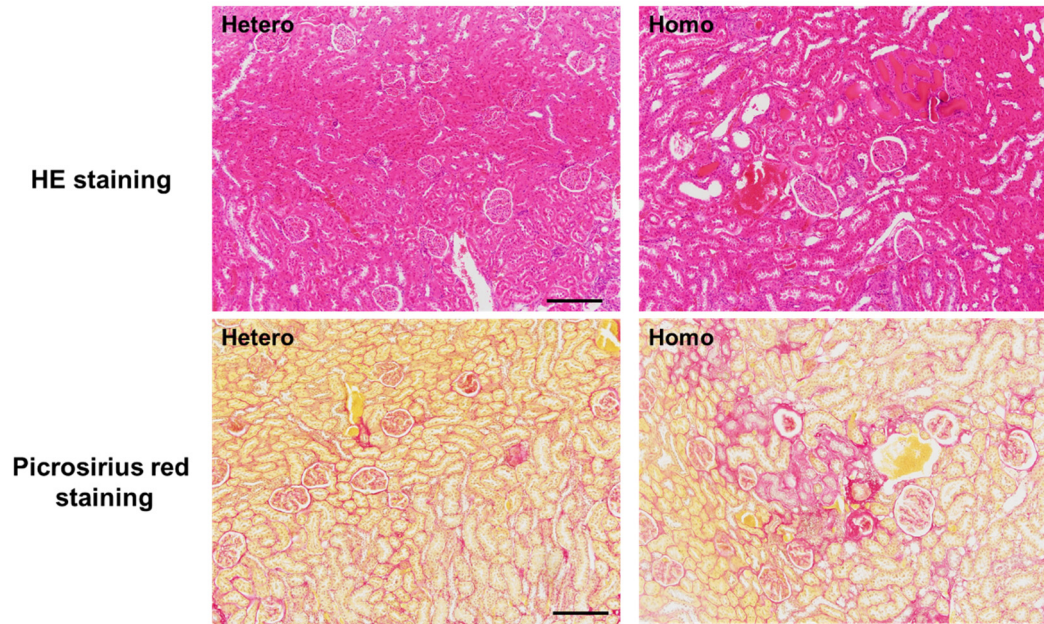

**Figure S1.** Histological analysis of kidney from Zucker Fatty Diabetes Mellitus (ZFDM)-Lepr<sup>fa/+</sup> (Hetero) and ZFDM-Lepr<sup>fa/fa</sup> (Homo) rats. Thin sections (4 μm) were made from paraffin-embedded isolated kidney from ZFDM rats at 36–38 weeks old (Hetero: *n* = 8, Homo: *n* = 10). Representative hematoxylin and eosin (HE) and picrosirius red stained sections were shown. In the picrosirius red staining, collagen was stained in red and cytoplasm was stained in yellow. Scale bar: 100 μm.

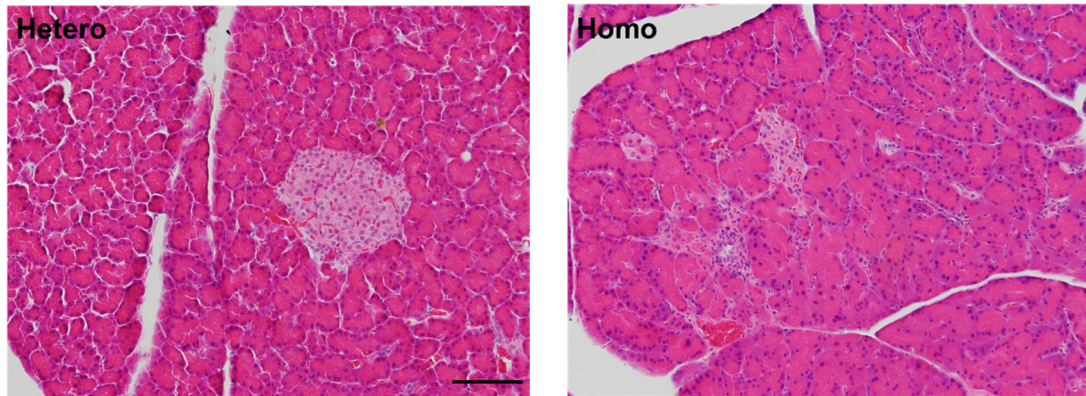

**Figure S2.** Histological analysis of pancreas from ZFDM rats. Thin sections (4  $\mu\text{m}$ ) were made from paraffin-embedded isolated pancreas from ZFDM rats at 36–38 weeks old (Hetero:  $n = 6$ , Homo:  $n = 7$ ). Representative HE stained sections were shown. Scale bar: 100  $\mu\text{m}$ .

**Table S1.** The electrocardiogram analysis of Zucker Fatty Diabetes Mellitus (ZFDM)-Lepr<sup>fa/+</sup> (Hetero) and ZFDM-Lepr<sup>fa/fa</sup> (Homo) at 20 weeks old (Hetero: *n* = 8, Homo: *n* = 10). The rats were anesthetized by an isoflurane (2.5%) inhalation. Electrocardiogram was recorded in lead II configuration. Results were expressed as means ± standard error of the mean. \*\**p* < 0.01 vs. Hetero.

|                        | Hetero       | Homo          |
|------------------------|--------------|---------------|
| R interval (ms)        | 214.9 ± 5.6  | 236.2 ± 3.8** |
| Heart rates (b. p. m.) | 280.6 ± 7.5  | 254.7 ± 4.0** |
| PR interval (ms)       | 53.1 ± 1.1   | 50.2 ± 1.9    |
| P duration (ms)        | 16.0 ± 1.7   | 22.6 ± 2.8    |
| QRS interval (ms)      | 16.0 ± 0.7   | 16.7 ± 1.4    |
| P amplitude (μV)       | 25.8 ± 3.3   | 33.9 ± 13.1   |
| R amplitude (μV)       | 377.1 ± 40.0 | 395.2 ± 69.4  |
